# Supplementary material for: Risk factors for venous thromboembolism and atherosclerotic cardiovascular disease: do they differ in patients with rheumatoid arthritis?
Source: PubMed Central journal article supplement — RMD Open. 2021 Jun 30;7(2):e001618. doi: 10.1136/rmdopen-2021-001618 (PMC8246357; doi:10.1136/rmdopen-2021-001618), 2021-06-30
Supplement: rmdopen-2021-001618supp001.pdf [file rmdopen-2021-001618supp001.pdf]

## Supplementary Material

**Table 1S.** ICD 9 and 10 codes for the outcomes

| <b>Outcomes</b> | <b>ICD-9 codes</b> | <b>ICD-10 codes</b>                   |
|-----------------|--------------------|---------------------------------------|
| ASCVD           | 410*and 428*       | I21.* and I22.*and I 50.*             |
| VTE             | 415* and 451*-453* | I26 and I80.1-I80.2, I81, I82.2-I82.9 |

## Supplementary Results

All VTE events were identified via questionnaires. Of the 539 VTE events, 44 (82.4%) were validated by using ICD 9/10 codes from hospital/death records. In only 95 (17.6%) patients, a protocolized interview was needed to validate the event.

Remission: 3.5%, low disease activity: 49.3%, moderate disease activity: 45.1%, high disease activity: 2.1%

The association of disease activity with VTE and ASCVD

|              | <b>Remission</b> | <b>Low disease activity</b> | <b>Moderate disease activity</b> | <b>High disease activity</b> |
|--------------|------------------|-----------------------------|----------------------------------|------------------------------|
| <b>VTE</b>   | Reference        | 1.08 (0.68-1.77)            | 1.00 (0.51-1.61)                 | 0.85 (0.39-1.67)             |
| <b>ASCVD</b> | Reference        | 1.10 (0.74-1.63)            | 1.04 (0.68-1.59)                 | 0.92 (0.55-1.56)             |

**Table 2S. Baseline characteristics of RA patients with VTE and without any CVD**

| <b>Variables</b>                | <b>Without any CVD,<br/>N=25,070</b> | <b>With VTE,<br/>N=506</b> | <b>P value</b> |
|---------------------------------|--------------------------------------|----------------------------|----------------|
| Age, years                      | 57.9 (13.1)                          | 67.0 (11.8)                | <0.001         |
| Female, %                       | 81.7                                 | 79.1                       | 0.125          |
| Caucasian, %                    | 93.6                                 | 93.1                       | 0.672          |
| RA duration, years              | 13.5 (12.0)                          | 20.0 (13.1)                | <0.001         |
| BMI, kg/m <sup>2</sup>          | 28.3 (6.4)                           | 30.4 (7.8)                 | <0.001         |
| Obesity, %                      | 29.3                                 | 41.9                       | <0.001         |
| Exercise, %                     | 13.7                                 | 5.7                        | <0.001         |
| RDCI (0-9)                      | 1.6 (1.5)                            | 2.7 (1.80)                 | <0.001         |
| Ever-smoked, %                  | 42.3                                 | 43.5                       | 0.599          |
| Diabetes, %                     | 8.7                                  | 17.8                       | <0.001         |
| Hypertension, %                 | 43.5                                 | 59.9                       | <0.001         |
| Pulmonary disease, %            | 6.2                                  | 19.4                       | <0.001         |
| Prior fracture <sup>‡</sup> , % | 2.3                                  | 6.9                        | <0.001         |
| Prior cancer <sup>‡</sup> , %   | 20.3                                 | 27.5                       | <0.001         |
| HAQ disability (0-3)            | 1.1 (0.7)                            | 1.4 (0.7)                  | <0.001         |
| PAS (0-10)                      | 3.9 (2.2)                            | 4.6 (2.2)                  | <0.001         |
| <b>Medications</b>              |                                      |                            |                |
| Glucocorticoid current, %       | 40.1                                 | 50.4                       | <0.001         |
| Glucocorticoid ever, %          | 70.7                                 | 85.4                       | <0.001         |
| Methotrexate, %                 | 56.3                                 | 48.2                       | 0.001          |
| Hydroxychloroquine, %           | 25.4                                 | 18.2                       | 0.001          |
| TNFi, %                         | 33.2                                 | 36.0                       | <0.001         |

|                            |      |      |        |
|----------------------------|------|------|--------|
| <b>Other b/tsDMARDs, %</b> | 10.0 | 20.8 | <0.001 |
| <b>NSAID, %</b>            | 65.4 | 37.6 | <0.001 |
| <b>Aspirin, %</b>          | 21.0 | 24.3 | <0.001 |
| <b>Statin, %</b>           | 11.1 | 27.9 | <0.001 |
| <b>Estrogen, %</b>         | 20.9 | 10.3 | <0.001 |

\*The values are mean (SD) unless indicated otherwise.

¶Pulmonary disease excluding pulmonary emboli.

‡Prior fracture and cancer diagnosis >1 year before cohort entry and not on active treatment.

RA= Rheumatoid arthritis; VTE= Venous thromboembolism; ASCVD= Atherosclerotic cardiovascular disease; CVD= Cardiovascular disease; BMI= Body mass index; RDCI= Rheumatic diseases comorbidity index; HAQ= Health assessment questionnaire; PAS= Patient activity scale; TNFi= Tumor necrosis factor- $\alpha$  inhibitors; b/tsDMARDs= Biological or targeted synthetic disease modifying antirheumatic drugs; NSAID= Nonsteroidal anti-inflammatory drugs.

**Table 3S. The association of disease activity with VTE and ASCVD\***

|              | <b>Remission</b> | <b>Low disease activity</b> | <b>Moderate disease activity</b> | <b>High disease activity</b> |
|--------------|------------------|-----------------------------|----------------------------------|------------------------------|
| <b>VTE</b>   | Reference        | 1.08 (0.68-1.77)            | 1.00 (0.51-1.61)                 | 0.85 (0.39-1.67)             |
| <b>ASCVD</b> | Reference        | 1.10 (0.74-1.63)            | 1.04 (0.68-1.59)                 | 0.92 (0.55-1.56)             |

\*Remission: 3.5%, low disease activity: 49.3%, moderate disease activity: 45.1%, high disease activity: 2.1%. As the % of patients in remission or high disease activity were low, in the main analysis remission and low disease activity vs. moderate and severe disease activity were categorized in the same group.
